# Supplementary material for: Multilayer sensing platform: gold nanoparticles/prussian blue decorated graphite paper for NADH and H2O2 detection
Source: Royal Society of Chemistry journal article supplement (doi:10.1039/c8an01502c), 2018-01-01
Supplement: c8an01502c1.pdf [file c8an01502c1.pdf]

## Electronic Supplementary Information

### **Multilayer sensing platform: gold nanoparticles/prussian blue decorated graphite paper for NADH and H<sub>2</sub>O<sub>2</sub> detection**

Meng Wang, Xianwen Kan\*

College of Chemistry and Materials Science, Anhui Normal University, Wuhu 241000, P.R. China; The Key Laboratory of Functional Molecular Solids, Ministry of Education; Anhui Laboratory of Molecule-Based Materials, Anhui Key Laboratory of Chemo-Biosensing.

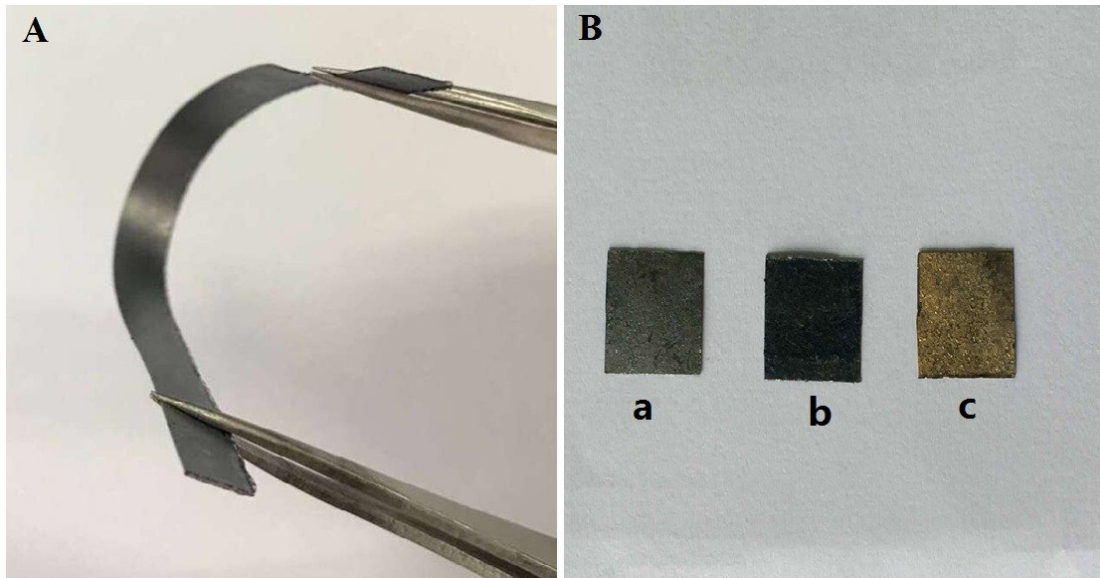

**Fig. S1** (A ) Photograph of the bent EGP. (B) Photographs of EGP (a), PB/EGP (b), and AuNPs/PB/EGP (c).

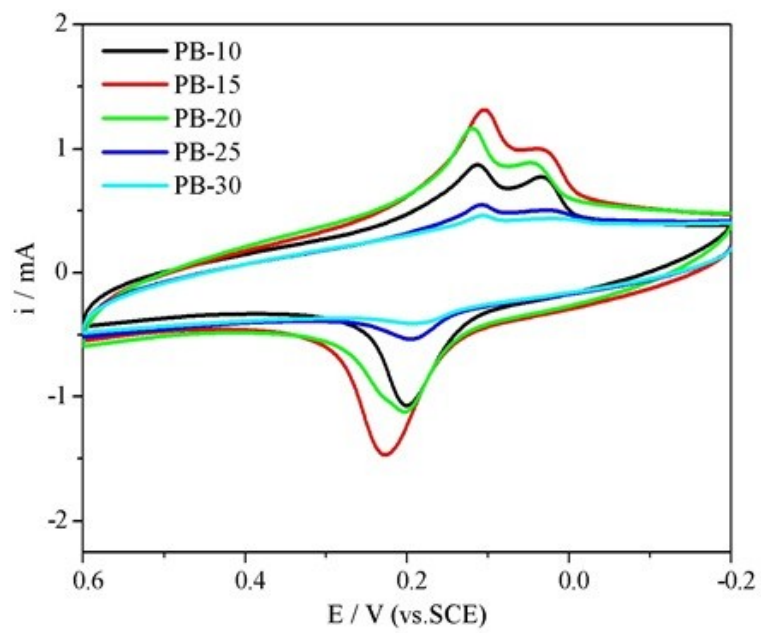

**Fig. S2** CV curves of AuNPs/PB/EGP in blank electrolyte. (PB film was prepared under different electrosynthesis scan cycles.)

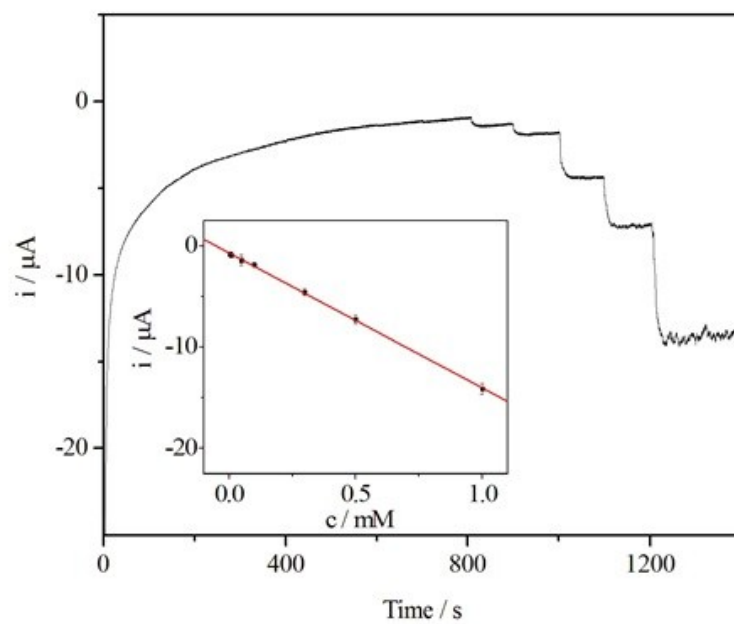

**Fig. S3** Amperometric response of EGP for NADH detection. (Inset: the corresponding calibration curve.)

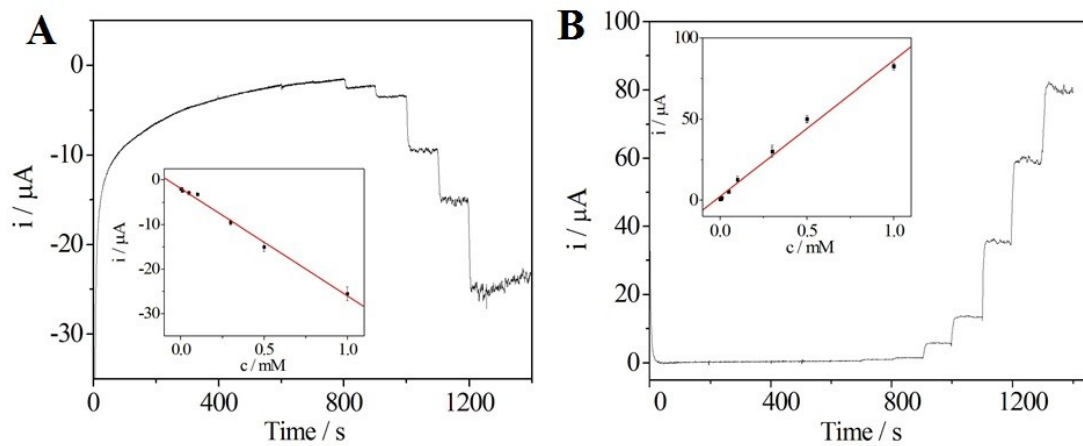

**Fig. S4** Amperometric responses of PB/EGP for NADH (A) and  $\text{H}_2\text{O}_2$  detection (B).

(Inset: the corresponding calibration curves.)

**Table S1** Comparison of other electrochemical methods for NADH detection with our work.

| Modified Electrode         | Linear range ( $\mu\text{mol/L}$ ) | LOD ( $\mu\text{mol/L}$ ) | References |
|----------------------------|------------------------------------|---------------------------|------------|
| GCE/CuWO <sub>4</sub>      | 0.2-380.0                          | 0.2                       | 1          |
| GCE/NDG                    | 0.5-12.0                           | 0.4                       | 2          |
| GCE/GN-AuNRs               | 20.0-160.0                         | 6.0                       | 3          |
| GCE/nPEDOT                 | 5.0-45.0                           | 3.8                       | 4          |
| GCE/NiONPs                 | 0.11-1000                          | 0.106                     | 5          |
| InGaN/GaN NW               | 5-10000                            | 1.9                       | 6          |
| GCE/APBA/MWCNTs            | 0.5-1000                           | 0.16                      | 7          |
| GCE/Au-AgNPs/P(L-Cys)/ERGO | 0.082-73.0                         | 0.009                     | 8          |
| AuNPs/PB/EGP               | 0.5-1000                           | 0.2                       | This work  |

### References

- 1 K. Aneesh, C. vusa and S. Berchmans, *Sens. Actuators, B.*, 2017, **253**, 723.
- 2 M.Sankararao and M.Jayaraman, *J. Electroanal.Chem.*, 2016, **775**, 329.
- 3 L.Li, H. Lu and L. Deng, *Talanta* , 2013, **113**, 1.
- 4 R. Rajaram, S. Anandhakumar and J. Mathiyarasu, *J. Electroanal. Chem.*,2015, **746**, 75.
- 5 E. Sharifia, A. Salimi and E. Shamsa, *Biosens. Bioelectron.*, 2013, **45**, 260.
- 6 M. Riedel, S. Holzel, P. Hille, J. Schormann, M. Eickhoff and F. Lisdat, *Biosens. Bioelectron.*, 2017, **94**, 298.
- 7 J. Li, Q. Sun, Y. Mao, Z. Bai, X. Ning and J. Zheng, *J. Electroanal. Chem.*, 2017,**794**, 1.
- 8 G. Aydođdu Tiđ, *Talanta*, 2017, **175**, 382.

**Table S2** Comparison of other electrochemical methods for H<sub>2</sub>O<sub>2</sub> detection with our work.

| Modified Electrode    | Linear range ( $\mu\text{mol/L}$ ) | LOD ( $\mu\text{mol/L}$ ) | References |
|-----------------------|------------------------------------|---------------------------|------------|
| GCE/CuWO <sub>4</sub> | 24.87-36000                        | 207.64                    | 1          |
| GCE/Ag NSs            | 5-6000                             | 0.17                      | 2          |
| GCE/Pt-ZnO            | 20-5000                            | 1.5                       | 3          |
| GCE/Mb-ZnO            | 4.8-200                            | 2.0                       | 4          |
| GCE/Pt/GN             | 2.5-6650                           | 0.8                       | 5          |
| CFEs/PDA/PB/CNT       | 1-1400                             | 0.7                       | 6          |
| AuNPs/PB/EGP          | 0.05-1000                          | 0.00483                   | This work  |

#### References

- 1 K. Aneesh, C. vusa and S. Berchmans, *Sens. Actuators, B.*, 2017, **253**, 723.
- 2 B. Ma, C. Kong, X. Hu, K. Liu, Q. Huang, J. Lv, W. Lu, X. Zhang, Z. Yang and S. Yang, *Biosens. Bioelectron.*, 2018, **106**, 29.
- 3 X. Ke, G. Zhu, Y. Dai, Y. Shen, J. Yang and J. Liu, *J. Electroanal. Chem.*, 2018, **817**, 176.
- 4 G. Zhao, J. Xu and H. Chen, *Anal. Biochem.*, 2006, **350**, 145.
- 5 F. Zhang, Z. Wang, Y. Zhang, Z. Zheng, C. Wang, Y. Du and W. Ye, *Int. J. Electrochem. Sci.*, 2012, **7**, 1968.
- 6 R. Li, X. Liu, W. Qiu and M. Zhang, *Anal. Chem.*, 2016, **88**, 7769.
